# Supplementary material for: Antitumor potential of new low molecular weight antioxidative preparations from the white rot fungus Cerrena unicolor against human colon cancer cells
Source: PubMed Central journal article supplement (PMC6374373; doi:10.1038/s41598-018-37947-z), 2019-02-13
Supplement: 41598_2018_37947_MOESM1_ESM.pdf [file 41598_2018_37947_MOESM1_ESM.pdf]

# **Antitumor potential of new low molecular weight antioxidative preparations from the white rot fungus *Cerrena unicolor* against human colon cancer cells**

Anna Matuszewska<sup>1</sup>, Dawid Stefaniuk<sup>1</sup>, Magdalena Jaszek<sup>1</sup>, Mateusz Pięt<sup>2</sup>, Adrian Zając<sup>3</sup>,  
Łukasz Matuszewski<sup>4</sup>, Iga Cios<sup>1</sup>, Marcin Graż<sup>1</sup>, Roman Paduch<sup>5</sup>, Renata Bancierz<sup>1</sup>

<sup>1</sup>Department of Biochemistry, Maria Curie-Skłodowska University, Lublin, Poland

<sup>2</sup>Department of Virology and Immunology, Maria Curie-Skłodowska University, Lublin, Poland

<sup>3</sup>Department of Comparative Anatomy and Anthropology, Maria Curie-Skłodowska University, Lublin, Poland

<sup>4</sup>Department of Paediatric Orthopaedics and Rehabilitation, Medical University of Lublin, Poland

<sup>5</sup>Department of General Ophthalmology, Medical University of Lublin, Lublin, Poland

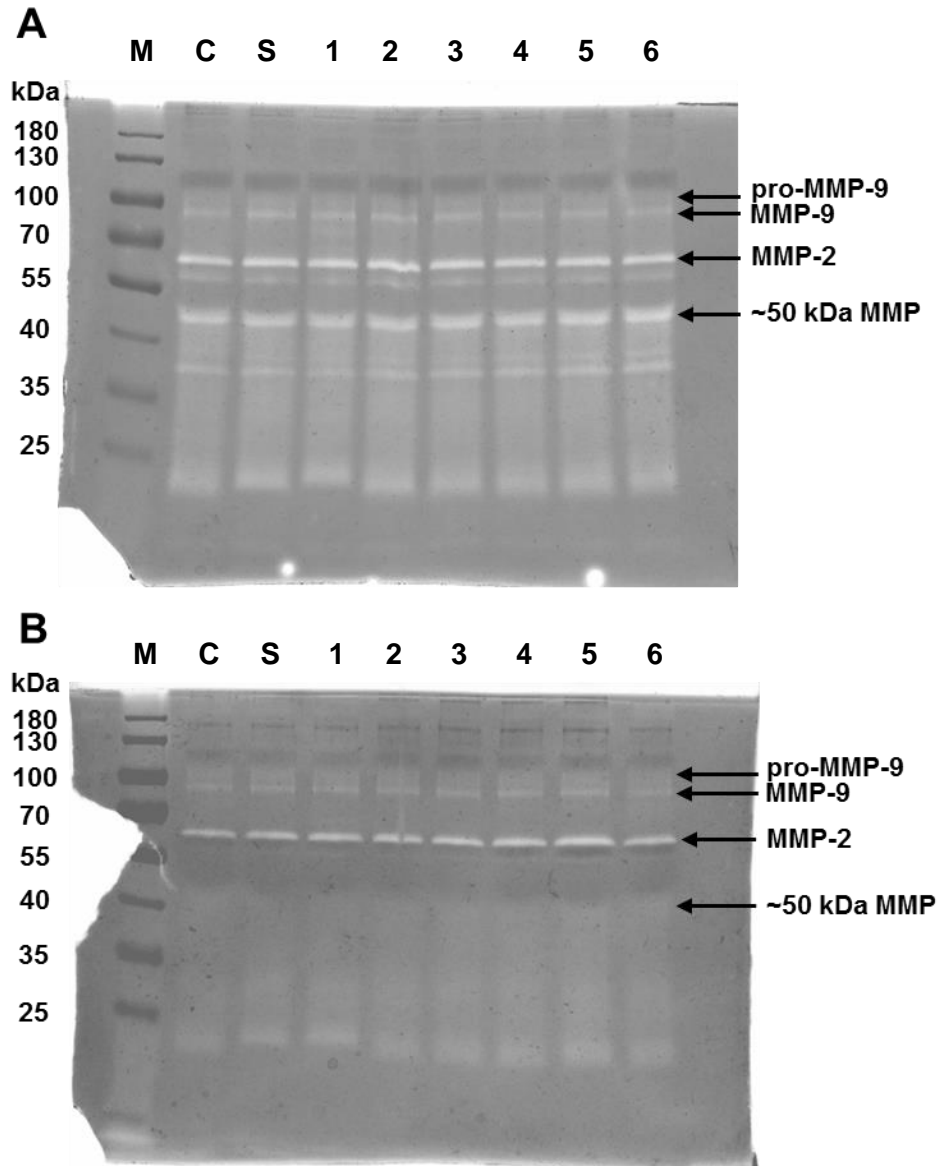

**Fig. S1.** Gelatin zymography analysis of enzymatic activity of matrix metalloproteinases MMP-2 and MMP-9 secreted by CCD 841 CoTr (A) and HT-29 (B) cells treated with fractions S and 1 - 6; M – molecular mass marker; C – control.

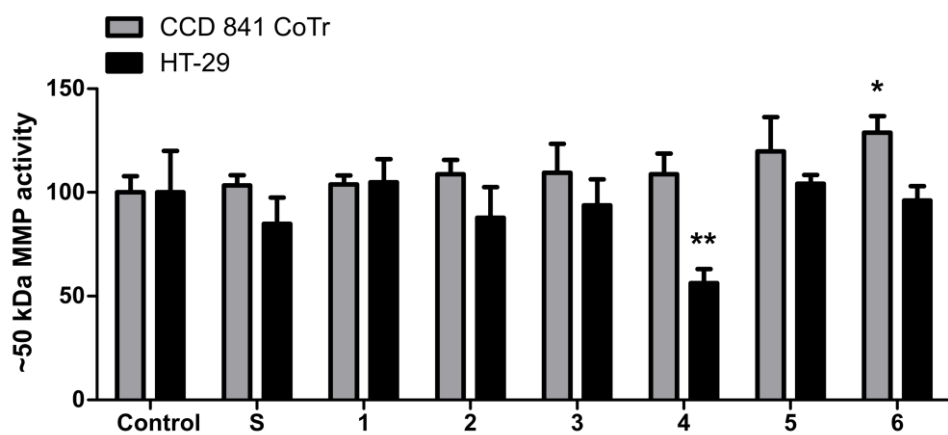

**Fig. S2.** Activity of ~50 kDa MMP secreted by CCD 841 CoTr and HT-29 cells.
